# Supplementary material for: Bacterial-induced maternal interleukin-17A pathway promotes autistic-like behaviors in mouse offspring
Source: PubMed Central journal article supplement — Exp Anim. 2020 Jan 31;69(2):250–60. doi: 10.1538/expanim.19-0156 (PMC7220715; doi:10.1538/expanim.19-0156), 2020-01-31
Supplement: expanim-69-250-s001.pdf [file expanim-69-250-s001.pdf]

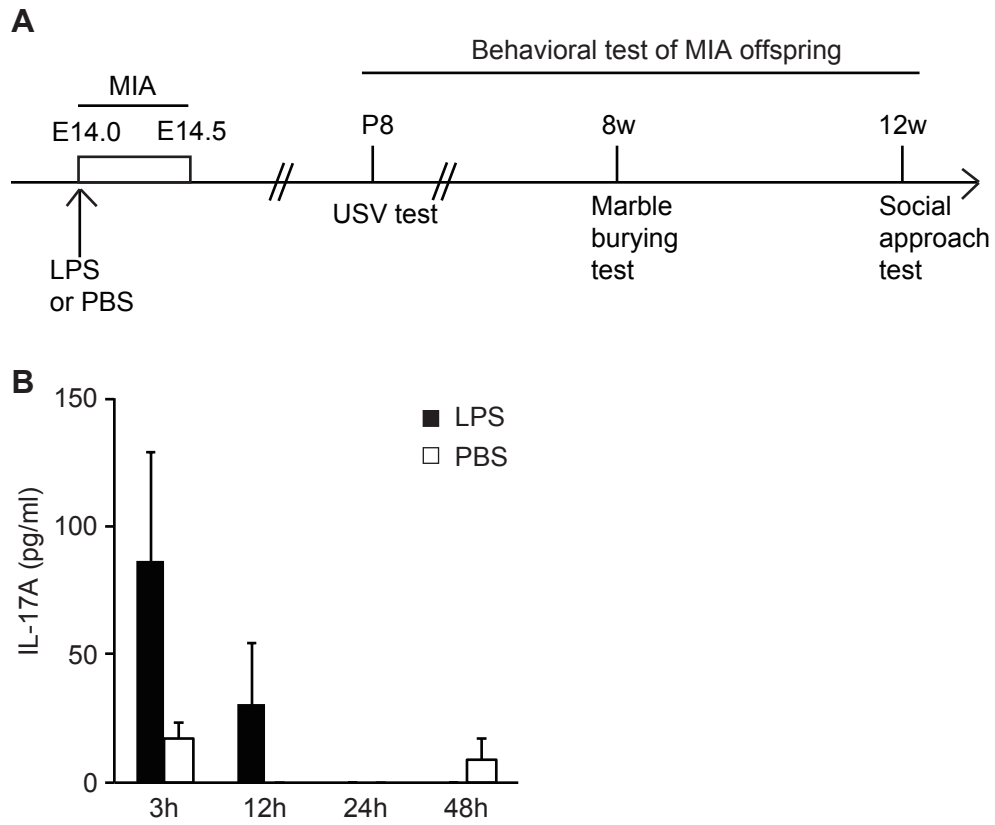

**Supplementary Fig. S1.** (A) Schematic diagram of the experiment design of LPS-induced MIA model. (B) Serum concentrations of IL-17A after LPS- or PBS- injection on E14.0 was measured by ELISA (n = 3 for all groups except n = 5 for 12 h). Error bars represent SEM.

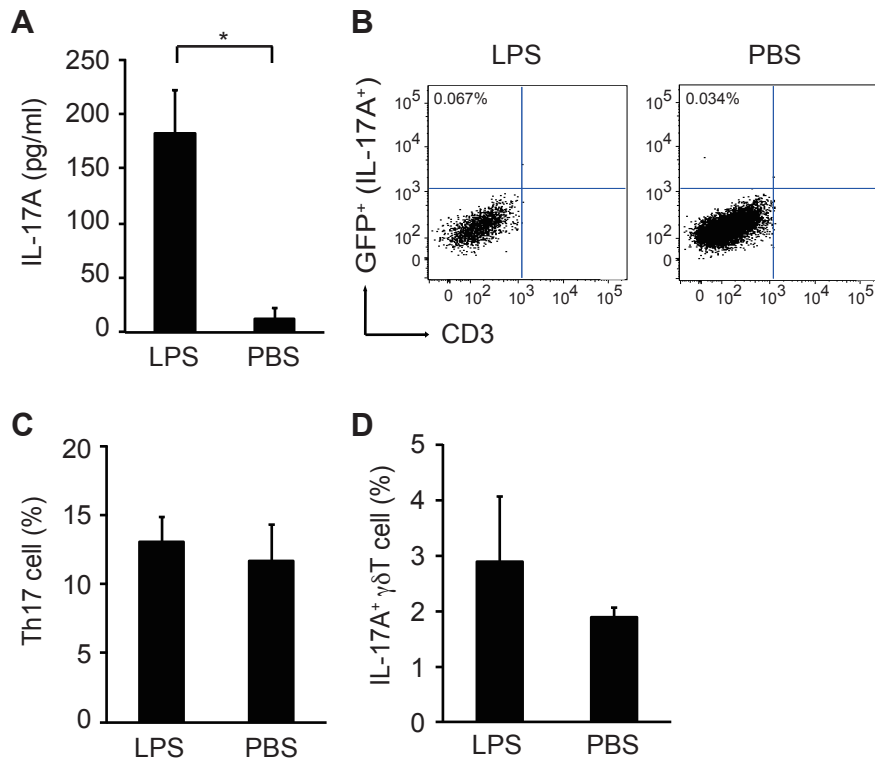

**Supplementary Fig. S2.** (A) Serum concentrations of IL-17A of IL-17A-GFP reporter mice at 3 h post-injection of LPS or PBS on E14.0 was measured by ELISA [n = 6 (LPS), n = 3 (PBS)]. (B) Flow cytometric analysis of GFP<sup>+</sup> (IL-17A<sup>+</sup>) cells including ILC3 cells (Gated as CD45<sup>+</sup>, CD3<sup>-</sup>, CD4<sup>-</sup>, TCRγδ<sup>-</sup>). Proportion of IL-17A<sup>+</sup> cells are shown. (C) proportion of Th17 cells among CD4<sup>+</sup> T cells in the small intestine lamina propria at 3 h post-injection of LPS or PBS. (D) proportion of IL-17A<sup>+</sup> γδ T cells (Gated as CD45<sup>+</sup>, CD3<sup>+</sup>, CD4<sup>-</sup>, TCRγδ<sup>+</sup>) in the small intestine lamina propria at 3 h post-injection of LPS or PBS. Error bars represent SEM. Statistical significance was assessed using Student's *t*-test (\**p* < 0.05).
